# Supplementary material for: Proteomic Profiling of Plant and Pathogen Interaction on the Leaf Epidermis
Source: MDPI journal article supplement (doi:10.3390/ijms232012171), 2022-10-12
Supplement: s1 [file s1]

**Supplementary Table S1.** List of proteins up-regulated in the leaf epidermis at 4 hpi. Asterisk (\*) indicates proteins up-regulated in the leaf epidermis as well as in the whole leaf.

| Accession                                                                    | Protein names                                             | Fold-change | p-value   |
|------------------------------------------------------------------------------|-----------------------------------------------------------|-------------|-----------|
| <b><u>3 Proteins related to stomatal closure and epidermal cell fate</u></b> |                                                           |             |           |
| AT4G33050.2                                                                  | IQ domain-containing protein IQM1                         | 100         | 4.21.E-16 |
| AT1G01510.1                                                                  | C-terminal binding protein AN (CtBP)                      | 3.6         | 2.32.E-06 |
| AT4G18950.1                                                                  | Integrin-linked protein kinase family                     | 1.9         | 2.81.E-02 |
| <b><u>7 Receptor proteins</u></b>                                            |                                                           |             |           |
| AT4G04540.1                                                                  | Putative cysteine-rich receptor-like protein kinase 39    | 100         | 4.21.E-16 |
| AT2G01070.1                                                                  | Lung seven transmembrane receptor family protein          | 12.3        | 4.21.E-16 |
| AT1G68400.1                                                                  | Probable leucine-rich repeat receptor-like protein kinase | 3.1         | 2.26.E-02 |
| AT3G17350.1                                                                  | Wall-associated receptor kinase carboxy-terminal protein  | 2.3         | 1.31.E-02 |
| AT4G23170.1                                                                  | Putative cysteine-rich receptor-like protein kinase 9     | 1.6         | 7.57.E-04 |
| AT5G61480.1                                                                  | Leucine-rich repeat receptor-like protein kinase TDR      | 7.4         | 9.27.E-15 |
| AT1G48630.1                                                                  | Receptor for activated C kinase 1B                        | 1.6         | 1.72.E-03 |
| <b><u>4 Plant type cell wall and cell wall organization</u></b>              |                                                           |             |           |
| AT5G22740.1                                                                  | Glucomannan 4-beta-mannosyltransferase 2                  | 2.8         | 2.79.E-07 |
| AT4G19420.1                                                                  | Pectin acetyltransferase 8                                | 2.1         | 8.04.E-03 |
| AT5G18470.1                                                                  | Curculin-like (Mannose-binding) lectin family protein     | 1.6         | 4.00.E-02 |
| AT2G20810.1                                                                  | Probable galacturonosyltransferase 10                     | 1.9         | 2.02.E-02 |
| <b><u>31 Transmembrane proteins (transport-related)</u></b>                  |                                                           |             |           |
| AT1G14140.1                                                                  | Mitochondrial uncoupling protein 3 (AtPUMP3)              | 100         | 4.21.E-16 |
| AT1G16020.1                                                                  | Vacuolar fusion protein CCZ1 homolog A                    | 100         | 4.21.E-16 |
| AT1G72820.1                                                                  | At1g72820/F3N23_2 (F3N23.2 protein)                       | 100         | 4.21.E-16 |
| AT2G32720.1                                                                  | Cytochrome b5 isoform B (AtCb5-B)                         | 100         | 4.21.E-16 |
| AT2G39130.1                                                                  | Amino acid transporter AVT1C (AtAvt1C)                    | 100         | 4.21.E-16 |
| AT5G40930.1                                                                  | Mitochondrial import receptor subunit TOM20-4             | 100         | 4.21.E-16 |
| AT1G17200.1                                                                  | CASP-like protein 2A1 (AtCASPL2A1)                        | 100         | 4.21.E-16 |
| AT4G39890.1                                                                  | Ras-related protein RABH1c (AtRABH1c)                     | 9.6         | 4.21.E-16 |
| AT3G11170.1                                                                  | sn-2 acyl-lipid omega-3 desaturase (ferredoxin)           | 7.8         | 2.08.E-12 |
| AT1G27695.1                                                                  | Protein TRIGALACTOSYLDIACYLGLYCEROL 5                     | 5.3         | 2.70.E-07 |
| AT5G42960.1                                                                  | Outer envelope pore protein 24B                           | 5.0         | 9.03.E-13 |
| AT4G00430.1                                                                  | Probable aquaporin PIP1-4                                 | 4.3         | 8.71.E-13 |
| AT1G69680.1                                                                  | At1g69680/T6C23_12                                        | 3.4         | 8.14.E-10 |
| AT3G08710.1                                                                  | Thioredoxin H9 (AtTrxh9)                                  | 3.4         | 7.01.E-07 |
| AT5G55710.1                                                                  | Protein TIC 20-v                                          | 3.3         | 1.98.E-04 |
| AT2G31710.1                                                                  | Vacuolar ATPase assembly integral membrane                | 3.2         | 4.27.E-06 |

| Accession                                                                      | Protein names                                       | Fold-change | p-value   |
|--------------------------------------------------------------------------------|-----------------------------------------------------|-------------|-----------|
| AT1G04980.1                                                                    | Protein disulfide-isomerase like 2-2                | 2.9         | 7.84.E-04 |
| AT2G39210.1                                                                    | At2g39210/T16B24.15 (Nodulin-like protein)          | 2.9         | 2.44.E-03 |
| AT1G08380.1                                                                    | Photosystem I subunit O (PSI-O)                     | 2.6         | 8.80.E-07 |
| AT5G45750.1                                                                    | Ras-related protein RABA1c (AtRABA1c)               | 2.6         | 6.91.E-03 |
| AT1G20840.1                                                                    | Monosaccharide-sensing protein 1                    | 2.6         | 2.34.E-04 |
| AT1G06210.1                                                                    | TOM1-like protein 2                                 | 2.5         | 4.40.E-02 |
| ATCG01070.1                                                                    | NAD(P)H-quinone oxidoreductase subunit 4L           | 2.4         | 1.86.E-03 |
| AT3G26570.1                                                                    | Inorganic phosphate transporter 2-1                 | 2.2         | 8.73.E-04 |
| AT4G25760.1                                                                    | Protein GLUTAMINE DUMPER 2                          | 1.9         | 1.37.E-03 |
| AT2G38410.1                                                                    | TOM1-like protein 6                                 | 1.8         | 9.92.E-03 |
| AT2G12400.1                                                                    | Plasma membrane fusion protein                      | 1.8         | 1.33.E-03 |
| AT5G47200.1                                                                    | Ras-related protein RABD2b (AtRABD2b)               | 1.7         | 3.58.E-04 |
| AT2G36410.2                                                                    | RAB6-interacting golgin                             | 2.0         | 2.46.E-03 |
| AT3G01050.1                                                                    | Membrane-anchored ubiquitin-fold protein 1 (AtMUB1) | 3.1         | 2.19.E-08 |
| ATCG00580.1                                                                    | Cytochrome b559 subunit alpha                       | 1.6         | 3.83.E-03 |
| <b><u>12 Defense response proteins</u></b>                                     |                                                     |             |           |
| AT1G77470.1                                                                    | Replication factor C subunit 5 (AtRFC5)             | 100         | 4.21.E-16 |
| AT2G30740.1                                                                    | PTI1-like tyrosine-protein kinase 2 (PTI1-2)        | 100         | 4.21.E-16 |
| AT3G21220.1                                                                    | Mitogen-activated protein kinase kinase 5           | 100         | 4.21.E-16 |
| AT5G54380.1                                                                    | Receptor-like protein kinase THESEUS 1              | 100         | 4.21.E-16 |
| AT5G38900.1                                                                    | FrnE protein-like (Putative frnE protein)           | 2.5         | 3.22.E-03 |
| AT3G15020.1                                                                    | Malate dehydrogenase 2                              | 2.4         | 3.09.E-10 |
| AT3G19380.1                                                                    | U-box domain-containing protein 25                  | 2.3         | 3.17.E-10 |
| AT1G17420.1                                                                    | Lipoxygenase 3, chloroplastic (AtLOX3)              | 2.0         | 1.10.E-02 |
| AT4G09430.1                                                                    | Disease resistance protein (TIR-NBS-LRR class)      | 5.9         | 4.21.E-16 |
| AT3G04720.1                                                                    | Hevein-like preproprotein                           | 1.5         | 4.14.E-04 |
| AT2G26010.1                                                                    | Plant defensin 1.3                                  | 7.2         | 4.21.E-16 |
| AT4G16260.1                                                                    | Probable glucan endo-1,3-beta-glucosidase At4g16260 | 1.5         | 4.22.E-03 |
| <b><u>9 Proteins related to abiotic stress response and detoxification</u></b> |                                                     |             |           |
| AT4G16440.1                                                                    | Protein NAR1 (Nuclear architecture related 1)       | 100         | 4.21.E-16 |
| AT2G04080.1                                                                    | Protein DETOXIFICATION 2 (AtDTX2)                   | 5.2         | 5.62.E-06 |
| AT2G47180.1                                                                    | Galactinol synthase 1 (AtGolS1)                     | 3.1         | 4.83.E-06 |
| AT4G04885.1                                                                    | Polyadenylation and cleavage factor homolog 4       | 2.4         | 8.71.E-04 |
| AT1G54410.1                                                                    | Dehydrin HIRD11 (AtHIRD11)                          | 2.0         | 8.24.E-06 |
| AT3G03640.1                                                                    | Probable inactive beta-glucosidase 25 (AtBGLU25)    | 2.0         | 2.04.E-02 |
| AT3G13100.1                                                                    | Multidrug resistance-associated protein 7           | 100         | 4.21.E-16 |

| Accession                                                                | Protein names                                         | Fold-change | p-value   |
|--------------------------------------------------------------------------|-------------------------------------------------------|-------------|-----------|
| AT1G01620.1                                                              | Aquaporin PIP1-3 (AtPIP1;3)                           | 6.1         | 4.21.E-16 |
| AT2G22360.1                                                              | Chaperone protein dnaJ A6, chloroplastic (atDjA6)     | 1.6         | 1.36.E-02 |
| <b><u>7 Transcription factors and transcription related-proteins</u></b> |                                                       |             |           |
| AT3G42790.1                                                              | PHD finger protein ALFIN-LIKE 3 (Protein AL3)         | 100         | 4.21.E-16 |
| AT5G18960.1                                                              | Protein FAR1-RELATED SEQUENCE 12                      | 100         | 4.21.E-16 |
| AT2G04630.1                                                              | DNA-directed RNA polymerases II and V subunit 6B      | 9.1         | 1.70.E-08 |
| AT4G13670.1                                                              | Protein disulfide isomerase pTAC5,                    | 5.9         | 4.21.E-16 |
| AT2G35110.1                                                              | Protein NAP1 (ARP2/3 regulatory protein subunit NAPP) | 2.7         | 2.98.E-02 |
| AT4G40030.2                                                              | Histone H3.3 (Histone H3.2)                           | 1.5         | 3.76.E-03 |
| AT2G33510.2                                                              | ATP-dependent RNA helicase (At2g33510)                | 2.4         | 4.06.E-03 |
| <b><u>14 Ribosomal proteins</u></b>                                      |                                                       |             |           |
| AT3G14600.1                                                              | 60S ribosomal protein L18a-3                          | 4.6         | 1.01.E-10 |
| AT5G64670.1                                                              | Ribosomal protein L18e/L15 superfamily protein        | 4.0         | 1.79.E-05 |
| AT5G56670.1                                                              | 40S ribosomal protein S30                             | 3.0         | 2.74.E-08 |
| AT5G64140.1                                                              | 40S ribosomal protein S28-2                           | 2.9         | 4.41.E-06 |
| AT1G07070.1                                                              | 60S ribosomal protein L35a-1                          | 2.5         | 1.37.E-08 |
| AT3G43980.1                                                              | 40S ribosomal protein S29                             | 10          | 4.21.E-16 |
| AT5G47930.1                                                              | 40S ribosomal protein S27-3                           | 7.3         | 4.21.E-16 |
| AT3G53740.2                                                              | 60S ribosomal protein L36-2                           | 3.9         | 1.37.E-06 |
| ATCG00065.1                                                              | 30S ribosomal protein S12                             | 1.7         | 9.00.E-04 |
| AT5G57290.1                                                              | 60S acidic ribosomal protein P3-2                     | 1.9         | 3.32.E-02 |
| AT5G02610.2                                                              | 60S ribosomal protein L35-4                           | 1.6         | 5.05.E-03 |
| AT5G54600.1                                                              | 50S ribosomal protein L24                             | 1.6         | 2.30.E-02 |
| AT1G09590.1                                                              | 60S ribosomal protein L21-1                           | 1.5         | 8.80.E-04 |
| AT3G45030.1                                                              | 40S ribosomal protein S20-1                           | 1.5         | 1.01.E-03 |
| <b><u>3 Translation related proteins</u></b>                             |                                                       |             |           |
| AT5G18110.1                                                              | Eukaryotic translation initiation factor NCBP         | 5.0         | 5.42.E-06 |
| AT2G25800.1                                                              | Elongation factor Ts (DUF810)                         | 2.6         | 2.93.E-04 |
| AT4G10760.1                                                              | N6-adenosine-methyltransferase MT-A70-like            | 3.2         | 9.36.E-09 |
| <b><u>5 Proteinases</u></b>                                              |                                                       |             |           |
| AT3G26340.1                                                              | Proteasome subunit beta type-5-B                      | 100         | 4.21.E-16 |
| AT5G01800.1                                                              | AT5g01800/T20L15_70                                   | 100         | 4.21.E-16 |
| AT5G51740.1                                                              | Peptidase family M48 family protein                   | 100         | 4.21.E-16 |
| AT4G16800.1                                                              | Probable enoyl-CoA hydratase 2                        | 3.2         | 1.55.E-13 |
| AT1G51760.1                                                              | IAA-amino acid hydrolase ILR1-like 4                  | 1.7         | 1.33.E-05 |

| Accession                                                        | Protein names                                                   | Fold-change | p-value  |
|------------------------------------------------------------------|-----------------------------------------------------------------|-------------|----------|
| <b><u>3 Enzymes inhibitors</u></b>                               |                                                                 |             |          |
| AT4G25260.1                                                      | Pectinesterase inhibitor 7 (AtPMEI7)                            | 100         | 4.21E-16 |
| AT5G46950.1                                                      | At5g46950 (Plant invertase)                                     | 100         | 4.21E-16 |
| AT1G73260.1                                                      | Kunitz trypsin inhibitor 4 (AtKTI4)                             | 1.5         | 1.46E-02 |
| <b><u>8 Proteins related to plant growth and development</u></b> |                                                                 |             |          |
| AT5G64080.1                                                      | Non-specific lipid transfer protein GPI-anchored 31 (AtLTPG-31) | 100         | 4.21E-16 |
| AT5G56660.1                                                      | IAA-amino acid hydrolase ILR1-like 2                            | 100         | 4.21E-16 |
| AT3G09920.3                                                      | Phosphatidylinositol 4-phosphate 5-kinase 9 (AtPIP5K9)          | 100         | 4.21E-16 |
| AT1G75750.1                                                      | Gibberellin-regulated protein 1 (GAST1 protein homolog 1)       | 3.0         | 2.32E-04 |
| AT5G28750.1                                                      | Protein THYLAKOID ASSEMBLY 4                                    | 1.6         | 2.02E-02 |
| AT3G23980.1                                                      | Protein BLISTER (Protein KOLD SENSITIV-1)                       | 2.4         | 6.43E-03 |
| AT2G46720.1                                                      | 3-ketoacyl-CoA synthase 13 (KCS-13)                             | 1.5         | 3.85E-02 |
| AT1G05850.1                                                      | Chitinase-like protein 1 (AtCTL1)                               | 1.9         | 9.43E-03 |
| <b><u>86 Protein with other</u></b>                              |                                                                 |             |          |
| AT1G03650.1                                                      | Acyl-CoA N-acyltransferases (NAT) superfamily protein           | 100         | 4.21E-16 |
| AT1G22800.1                                                      | Putative methyltransferase At1g22800                            | 100         | 4.21E-16 |
| AT2G14835.1                                                      | Expressed protein (RING/U-box superfamily protein)              | 100         | 4.21E-16 |
| AT2G15240.1                                                      | At2g15240/F15A23.2 (Expressed protein)                          | 100         | 4.21E-16 |
| AT2G30170.1                                                      | Probable protein phosphatase 2C 26 (AtPP2C26)                   | 100         | 4.21E-16 |
| AT3G03560.1                                                      | Uncharacterized protein                                         | 100         | 4.21E-16 |
| AT3G12650.1                                                      | AT3g12650/T2E22_103 (Transmembrane protein)                     | 100         | 4.21E-16 |
| AT3G18270.1                                                      | Dipeptide epimerase (EC 5.1.1.-)                                | 100         | 4.21E-16 |
| AT3G22740.1                                                      | Homocysteine S-methyltransferase 3                              | 100         | 4.21E-16 |
| AT4G19100.1                                                      | Protein PAM68,                                                  | 100         | 4.21E-16 |
| AT4G19830.1                                                      | Peptidyl-prolyl cis-trans isomerase FKBP17-1                    | 100         | 4.21E-16 |
| AT4G31560.1                                                      | AT4g31560 (AT4g31560/F3L17_130)                                 | 100         | 4.21E-16 |
| AT4G37010.2                                                      | Calcium-binding protein CML19 (AtCEN2)                          | 100         | 4.21E-16 |
| AT4G37310.1                                                      | Cytochrome P450, family 81                                      | 100         | 4.21E-16 |
| AT5G23490.1                                                      | Uncharacterized protein                                         | 100         | 4.21E-16 |
| AT5G36950.1                                                      | Protease Do-like 10, mitochondrial (EC 3.4.21.-)                | 100         | 4.21E-16 |
| AT5G40340.1                                                      | Tudor/PWWP/MBT superfamily protein                              | 100         | 4.21E-16 |
| AT5G46580.1                                                      | Pentatricopeptide repeat-containing protein At5g46580           | 100         | 4.21E-16 |
| AT5G47810.1                                                      | Phosphohexokinase 2                                             | 100         | 4.21E-16 |
| AT4G31080.2                                                      | Integral membrane metal-binding family protein (DUF2296)        | 27.3        | 4.21E-16 |
| AT5G63550.2                                                      | DEK domain-containing chromatin associated protein              | 18.8        | 4.21E-16 |
| AT1G01725.1                                                      | Adenylosuccinate synthetase (T1N6.13 protein)                   | 12.9        | 4.21E-16 |

| Accession   | Protein names                                            | Fold-change | p-value  |
|-------------|----------------------------------------------------------|-------------|----------|
| AT1G31150.1 | F28K20.8 protein (K-box region protein (DUF1985))        | 12.8        | 4.21E-16 |
| AT1G66820.1 | Glycine-rich protein                                     | 10.3        | 4.21E-16 |
| AT2G32980.1 | AUGMIN subunit 2                                         | 9.5         | 4.21E-16 |
| AT1G47720.1 | Protein OSB1,                                            | 9.2         | 4.21E-16 |
| AT4G00231.1 | ARM repeat superfamily protein (F6N15.2 protein)         | 9.1         | 6.91E-13 |
| AT1G14060.1 | F7A19.14 protein (GCK domain-containing protein)         | 8.9         | 1.93E-09 |
| AT1G47570.1 | At1g47570 (RING/U-box superfamily protein)               | 8.7         | 3.05E-10 |
| AT5G63620.1 | AT5g63620/MBK5_9                                         | 7.0         | 1.04E-09 |
| AT3G17365.2 | S-adenosyl-L-methionine-dependent methyltransferases     | 6.5         | 4.21E-16 |
| AT5G06220.1 | LETM1-like protein                                       | 6.4         | 4.08E-06 |
| AT5G64410.1 | Oligopeptide transporter 4 (AtOPT4)                      | 6.2         | 1.18E-09 |
| AT4G34940.1 | Armadillo repeat only 1                                  | 5.9         | 5.56E-07 |
| AT3G10405.1 | At3g10405 (Vacuolar acid trehalase)                      | 5.9         | 4.21E-16 |
| AT2G38050.1 | Steroid 5-alpha-reductase DET2 (AtDET2)                  | 5.5         | 4.21E-16 |
| AT3G46630.1 | DCL protein (DUF3223)                                    | 4.8         | 4.52E-11 |
| AT5G52100.1 | Dihydrodipicolinate reductase-like protein CRR1,         | 4.5         | 9.27E-15 |
| AT4G31440.1 | Transcriptional regulator of RNA polII, SAGA, subunit    | 4.4         | 4.21E-16 |
| AT5G12240.1 | At5g12240 (Octanoyltransferase)                          | 4.2         | 4.21E-16 |
| AT1G47056.1 | F-box protein At1g47056                                  | 4.1         | 1.97E-05 |
| AT4G35320.1 | AT4g35320/F23E12_120                                     | 4.1         | 2.91E-04 |
| AT1G31850.3 | Probable methyltransferase PMT20 (EC 2.1.1.-)            | 3.7         | 9.55E-08 |
| AT1G32900.1 | Granule-bound starch synthase 1,                         | 3.6         | 1.26E-07 |
| AT4G15640.1 | Adenylyl cyclase (At4g15640)                             | 2.9         | 1.17E-03 |
| AT1G21770.1 | Acyl-CoA N-acyltransferases (NAT) superfamily protein    | 2.9         | 1.34E-07 |
| AT1G64910.1 | UDP-glycosyltransferase 79B10 (EC 2.4.1.-)               | 2.9         | 4.13E-03 |
| AT1G75170.1 | Sec14p-like phosphatidylinositol transfer family protein | 2.9         | 1.42E-02 |
| AT4G20760.1 | AT4g20760/F21C20_110 (NAD(P)-binding Rossmann protein    | 2.8         | 2.46E-10 |
| AT5G19250.1 | Uncharacterized GPI-anchored protein At5g19250           | 2.8         | 2.04E-03 |
| AT1G28140.1 | F3H9.20 protein (Integral membrane family protein)       | 2.8         | 2.04E-03 |
| AT1G03140.1 | Pre-mRNA-splicing factor 18                              | 2.7         | 7.50E-03 |
| AT5G62980.1 | Dihydroneopterin aldolase 2 (DHNA2)                      | 2.7         | 1.46E-04 |
| AT2G18700.1 | Probable alpha,alpha-trehalose-phosphate synthase        | 2.6         | 4.28E-02 |
| AT5G56340.1 | RING-type E3 ubiquitin transferase                       | 2.5         | 4.16E-02 |
| AT2G04570.1 | GDSL esterase/lipase At2g04570                           | 2.4         | 1.05E-03 |
| AT3G52110.1 | At3g52110 (Interferon-activable protein)                 | 2.4         | 8.04E-03 |
| AT5G48375.1 | Putative myrosinase 3 (Sinigrinase 3)                    | 2.3         | 2.36E-04 |
| AT5G58640.1 | AT5g58640/mzn1_90 (Selenoprotein, Rdx type)              | 2.3         | 2.32E-06 |
| AT3G07090.1 | PPPDE putative thiol peptidase family protein            | 2.2         | 3.72E-02 |

| Accession    | Protein names                                                       | Fold-change | p-value  |
|--------------|---------------------------------------------------------------------|-------------|----------|
| AT3G17930.1  | AT3g17930/MEB5_15                                                   | 2.2         | 8.30E-04 |
| AT1G55980.1  | AT1G56000 protein (At1g55980/T6H22.19)                              | 2.2         | 2.16E-04 |
| AT2G17972.1  | Expressed protein (Transmembrane protein)                           | 2.2         | 6.12E-03 |
| AT2G06990.1  | DExH-box ATP-dependent RNA helicase DExH10                          | 2.1         | 9.92E-03 |
| AT3G57340.2  | AT3G57340 protein                                                   | 2.0         | 4.99E-02 |
| AT1G50000.1  | 16S rRNA (uracil(1498)-N(3))-methyltransferase                      | 2.0         | 2.87E-02 |
| AT1G07230.1  | Non-specific phospholipase C1                                       | 1.9         | 4.81E-02 |
| AT2G25310.1  | ER membrane protein complex subunit-like protein (DUF2012)          | 1.9         | 3.76E-03 |
| AT2G17705.1  | Methionine-S-oxide reductase                                        | 1.9         | 4.75E-03 |
| AT5G24165.1  | At5g24165 (Uncharacterized protein At5g24165)                       | 1.9         | 1.59E-05 |
| AT5G15970.1  | Stress-induced protein KIN2 (Cold-induced protein COR6.6)           | 1.9         | 1.34E-05 |
| AT3G06610.1  | DNA-binding enhancer protein-like protein                           | 1.8         | 1.12E-03 |
| AT3G07180.1  | GPI transamidase component PIG-S-like protein                       | 1.8         | 8.59E-03 |
| AT2G45930.1  | Expressed protein                                                   | 1.7         | 3.18E-03 |
| AT1G60000.1  | AT1G60000 protein (Nucleic acid-binding protein, putative)          | 1.7         | 8.75E-03 |
| AT4G34150.1  | AT4g34150/F28A23_90 (At4g34150)                                     | 1.7         | 2.41E-04 |
| AT5G47890.1  | NADH dehydrogenase [ubiquinone] 1 alpha subcomplex subunit 2        | 1.7         | 1.32E-03 |
| AT4G21090.1  | Adrenodoxin-like protein 2                                          | 1.7         | 2.93E-02 |
| AT5G11580.1  | AT5g11580/F15N18_170                                                | 1.7         | 3.05E-02 |
| AT5G52800.3  | DNA primase                                                         | 1.7         | 5.16E-04 |
| AT2G27730.1  | Uncharacterized protein At2g27730, mitochondrial                    | 1.6         | 4.17E-05 |
| AT2G28630.1  | 3-ketoacyl-CoA synthase 12 (KCS-12)                                 | 1.6         | 3.55E-02 |
| AT5G47030.1  | ATP synthase subunit delta'                                         | 1.6         | 2.16E-04 |
| AT5G51545.1  | Protein LOW PSII ACCUMULATION 2, chloroplastic                      | 1.5         | 3.69E-02 |
| AT1G54630.1* | Carrier of the growing fatty acid chain in fatty acid biosynthesis. | 2.5         | 1.66E-02 |
| AT3G54670.3  | Structural maintenance of chromosomes protein 1                     | 6.2         | 1.42E-07 |

**Supplementary Table S2.** List of proteins up-regulated in the leaf epidermis at 24 hpi.  
Asterisk (\*) indicates proteins up-regulated in the leaf epidermis and in the whole leaf.

| Accession                                                                    | Protein names                                                     | Fold-change | p-value  |
|------------------------------------------------------------------------------|-------------------------------------------------------------------|-------------|----------|
| <b><u>6 Proteins related to stomatal closure and epidermal cell fate</u></b> |                                                                   |             |          |
| AT2G46410.1                                                                  | Transcription factor CPC (Protein CAPRICE)                        | 25.01       | 9.55E-07 |
| AT3G10220.1                                                                  | Tubulin-folding cofactor B (AtTFCB)                               | 20.82       | 2.01E-04 |
| AT4G20140.1                                                                  | LRR receptor-like serine/threonine-protein kinase GSO1            | 8.50        | 4.74E-15 |
| AT2G05100.1                                                                  | Chlorophyll a-b binding protein 2.1, chloroplastic                | 5.03        | 4.62E-05 |
| AT5G25980.2                                                                  | Myrosinase 2 (Thioglucosidase 2)                                  | 2.00        | 7.84E-03 |
| AT3G25520.1                                                                  | Protein ASYMMETRIC LEAVES1/2 ENHANCER 6                           | 1.84        | 2.57E-02 |
| <b><u>8 Receptor proteins</u></b>                                            |                                                                   |             |          |
| AT1G48480.1                                                                  | Probable inactive receptor kinase At1g48480                       | 65.67       | 2.16E-16 |
| AT1G72480.1*                                                                 | Lung seven transmembrane receptor family protein                  | 40.16       | 2.16E-16 |
| AT4G33430.2                                                                  | BRASSINOSTEROID INSENSITIVE1-associated receptor kinase 1         | 23.02       | 1.50E-07 |
| AT1G70520.1                                                                  | Cysteine-rich receptor-like protein kinase 2 (Cysteine-rich RLK2) | 10.14       | 4.40E-04 |
| AT1G52290.1                                                                  | Proline-rich receptor-like protein kinase (AtPERK15)              | 6.88        | 3.47E-02 |
| AT3G47110.1                                                                  | Putative receptor-like protein kinase At3g47110                   | 3.09        | 2.68E-06 |
| AT5G61480.1                                                                  | Leucine-rich repeat receptor-like protein kinase TDR              | 5.56        | 3.60E-03 |
| AT5G38470.1                                                                  | Ubiquitin receptor RAD23d (AtRAD23d)                              | 1.82        | 4.91E-02 |
| <b><u>13 Proteins related to cell wall organization</u></b>                  |                                                                   |             |          |
| AT5G17420.1                                                                  | Cellulose synthase A catalytic subunit 7 (AtIRX3)                 | 100         | 2.16E-16 |
| AT5G49215.1                                                                  | Pectin lyase-like superfamily protein                             | 100         | 2.16E-16 |
| AT1G75500.2                                                                  | Protein WALLS ARE THIN 1                                          | 34.30       | 1.40E-09 |
| AT1G69530.3                                                                  | Expansin-A1 (AtEXPA1) (Alpha-expansin-1) (At-EXP1)                | 31.85       | 2.16E-16 |
| AT1G32180.1                                                                  | Putative cellulose synthase-like protein D6 (AtCslD6)             | 3.83        | 5.23E-03 |
| AT1G55120.1                                                                  | Beta-fructofuranosidase, (Sucrose hydrolase 3)                    | 3.60        | 2.02E-02 |
| AT3G09410.1                                                                  | Pectin acetyltransferase 5                                        | 3.54        | 2.18E-02 |
| AT2G40610.1                                                                  | Expansin-A8 (AtEXPA8)                                             | 2.61        | 3.89E-02 |
| AT3G45970.1                                                                  | Expansin-like A1 (At-EXPL1)                                       | 2.37        | 2.05E-03 |
| AT3G14310.1                                                                  | Pectinesterase/pectinesterase inhibitor 3                         | 2.30        | 1.53E-03 |
| AT5G20950.2                                                                  | Beta-D-glucan exohydrolase-like protein                           | 2.03        | 1.50E-02 |
| AT2G04780.1                                                                  | Fasciclin-like arabinogalactan protein 7                          | 1.94        | 1.95E-02 |
| AT3G62110.1                                                                  | AT3g62110 (Pectin lyase-like superfamily protein)                 | 1.84        | 3.06E-02 |
| <b><u>24 Transmembrane proteins (transport-related)</u></b>                  |                                                                   |             |          |
| AT4G32160.1                                                                  | PX domain-containing protein EREL1 (Protein EREL-like 1)          | 100         | 2.16E-16 |
| AT4G14950.1                                                                  | Vacuole membrane protein KMS1                                     | 100         | 2.16E-16 |
| AT1G01620.1                                                                  | Aquaporin PIP1-3 (AtPIP1;3)                                       | 100         | 2.16E-16 |
| AT1G27330.1                                                                  | At1g27330 (Ribosome associated membrane protein RAMP4)            | 63.23       | 2.16E-16 |
| AT4G13220.1                                                                  | At4g13220 (Transmembrane protein)                                 | 39.01       | 9.77E-14 |
| AT5G64410.1                                                                  | Oligopeptide transporter 4 (AtOPT4)                               | 47.81       | 7.39E-11 |
| AT3G09300.1                                                                  | Oxysterol-binding protein-related protein 3B                      | 36.22       | 4.10E-10 |
| AT5G40660.1                                                                  | AT5g40660/MNF13_180 (ATP12 protein-like protein)                  | 31.09       | 2.16E-16 |
| AT1G14670.1                                                                  | Transmembrane 9 superfamily member 2                              | 21.06       | 8.75E-07 |

| Accession                                                                       | Protein names                                                   | Fold-change | p-value  |
|---------------------------------------------------------------------------------|-----------------------------------------------------------------|-------------|----------|
| AT1G32210.1                                                                     | Dolichyl-diphosphooligosaccharide DAD1 (AtDAD1)                 | 15.09       | 3.12E-05 |
| AT2G43130.1                                                                     | Ras-related protein RABA5c (AtRABA5c)                           | 11.15       | 6.25E-09 |
| AT5G62890.1                                                                     | Nucleobase-ascorbate transporter 6 (AtNAT6)                     | 10.06       | 8.48E-04 |
| AT2G45000.1                                                                     | Nuclear pore complex protein NUP62 (Nucleoporin 62)             | 8.65        | 1.75E-03 |
| AT5G38980.1                                                                     | At5g38980 (Transmembrane protein)                               | 8.91        | 1.98E-06 |
| AT3G22290.1                                                                     | Endoplasmic reticulum vesicle transporter protein               | 7.60        | 1.76E-05 |
| AT5G63040.1                                                                     | Emb CAB81845.1 (Transmembrane protein)                          | 7.45        | 4.35E-03 |
| AT2G47490.1                                                                     | Nicotinamide adenine dinucleotide transporter 1, (AtNDT1)       | 6.86        | 4.59E-03 |
| AT3G53610.2                                                                     | Ras-related protein RABE1a (AtRABE1a) (AtRab8B)                 | 6.58        | 9.71E-04 |
| AT2G46800.2                                                                     | Metal tolerance protein 1 (AtMTP1)                              | 5.91        | 1.86E-06 |
| AT5G03555.1                                                                     | Purine-uracil permease NCS1 (AtNCS1)                            | 3.31        | 4.49E-06 |
| AT5G36100.1                                                                     | Gb AAD26867.1 (Transmembrane protein)                           | 3.54        | 1.01E-02 |
| AT5G45750.1*                                                                    | Ras-related protein RABA1c (AtRABA1c)                           | 6.94        | 1.28E-02 |
| AT1G69295.1                                                                     | Plasmodesmata callose-binding protein 4 (AtPDCB4)               | 4.75        | 9.84E-04 |
| AT5G20650.1                                                                     | Copper transporter 5 (AtCOPT5)                                  | 2.17        | 5.91E-03 |
| <b><u>11 Defense response proteins</u></b>                                      |                                                                 |             |          |
| AT4G10500.1                                                                     | Protein DMR6-LIKE OXYGENASE 1                                   | 100         | 2.16E-16 |
| AT1G03150.1                                                                     | N-terminal acetyltransferase B complex catalytic subunit NAA20  | 100         | 2.16E-16 |
| AT5G16840.2                                                                     | Binding partner of ACD11 1                                      | 61.08       | 2.16E-16 |
| AT1G49780.1                                                                     | U-box domain-containing protein 26(Plant U-box protein 26)      | 59.62       | 2.16E-16 |
| AT3G22600.1                                                                     | Non-specific lipid transfer protein GPI-anchored 5 (AtLTPG-5)   | 59.17       | 1.56E-13 |
| AT3G46730.1                                                                     | Putative disease resistance RPP13-like protein 3                | 9.92        | 2.90E-05 |
| AT4G09430.1                                                                     | Disease resistance protein (TIR-NBS-LRR class)                  | 6.81        | 2.18E-06 |
| AT3G19190.1                                                                     | Autophagy-related protein 2 (AtAPG2)                            | 5.01        | 1.53E-03 |
| AT2G03440.1                                                                     | Nodulin-related protein 1 (AtNRP1)                              | 2.21        | 2.99E-03 |
| AT2G26010.1                                                                     | Plant defensin 1.3                                              | 5.61        | 1.26E-02 |
| AT2G42530.1                                                                     | Protein COLD-REGULATED 15B, chloroplastic (AtCOR15B)            | 1.83        | 4.14E-02 |
| <b><u>20 Proteins related to abiotic stress response and detoxification</u></b> |                                                                 |             |          |
| AT3G23560.1                                                                     | Protein DETOXIFICATION 19 (AtDTX19)                             | 100         | 2.16E-16 |
| AT3G51610.1                                                                     | ATP-dependent helicase/deoxyribonuclease subunit B              | 100         | 2.16E-16 |
| AT2G41100.3                                                                     | Calmodulin-like 12 (Touch-induced calmodulin-related protein 3) | 100         | 2.16E-16 |
| AT2G30170.1                                                                     | Probable protein phosphatase 2C 26 (AtPP2C26)                   | 100         | 2.16E-16 |
| AT2G04450.1                                                                     | Nudix hydrolase 6 (AtNUDT6)                                     | 100         | 2.16E-16 |
| AT5G35735.1                                                                     | Cytochrome b561 and DOMON domain-containing protein             | 32.14       | 4.74E-15 |
| AT3G19490.1                                                                     | Sodium/proton antiporter 1 (AtNHD1) (Na(+)/H(+) antiporter 1)   | 35.05       | 2.16E-16 |
| AT5G18040.1                                                                     | Protein HEAT-INDUCED TAS1 TARGET 2                              | 30.84       | 6.43E-10 |
| AT1G54410.1*                                                                    | Dehydrin HIRD11                                                 | 23.11       | 2.16E-16 |
| AT3G16670.1                                                                     | AT3g16670/MGL6_12                                               | 14.26       | 2.16E-16 |
| AT5G66400.1                                                                     | Dehydrin Rab18                                                  | 5.04        | 4.50E-13 |
| AT1G76180.1                                                                     | Dehydrin ERD14                                                  | 2.07        | 4.31E-03 |
| AT2G39460.1                                                                     | 60S ribosomal protein L23a-1 (AtRPL23A-1)                       | 2.99        | 9.48E-06 |
| AT1G52690.1                                                                     | Late embryogenesis abundant protein 7                           | 2.87        | 2.01E-05 |
| AT5G10010.1                                                                     | Protein HEAT INTOLERANT 4                                       | 2.07        | 2.58E-02 |



| Accession   | Protein names                                                | Fold-change | p-value  |
|-------------|--------------------------------------------------------------|-------------|----------|
| AT1G20450.1 | Dehydrin ERD10 (Low-temperature-induced protein LTI45)       | 1.93        | 1.40E-02 |
| AT5G23750.1 | Remorin 1.4 (AtREM1.4) (Remorin group 1 member 4)            | 1.90        | 1.58E-02 |
| AT3G13100.1 | Multidrug resistance-associated protein 7                    | 3.39        | 3.93E-05 |
| AT5G15970.1 | Stress-induced protein KIN2 (Cold-induced protein COR6.6)    | 2.67        | 1.21E-04 |
| AT5G52300.1 | Low-temperature-induced (Desiccation-responsive protein 29B) | 1.77        | 4.43E-02 |

## **22 Transcription factors and transcription related-proteins**

|              |                                                               |       |          |
|--------------|---------------------------------------------------------------|-------|----------|
| AT1G17440.2  | Transcription initiation factor TFIID subunit 12b             | 100   | 2.16E-16 |
| AT2G38560.1  | Transcription elongation factor TFIIS                         | 100   | 2.16E-16 |
| AT3G47610.1  | Transcription regulator/ zinc ion binding protein             | 100   | 2.16E-16 |
| AT4G16150.1  | Calmodulin-binding transcription activator 5                  | 100   | 2.16E-16 |
| AT5G42060.1  | Mediator-associated protein 3                                 | 100   | 2.16E-16 |
| AT5G51110.1  | Probable pterin-4-alpha-carbinolamine dehydratase             | 100   | 2.16E-16 |
| AT5G50320.1  | Elongator complex protein 3 (AtELP3) -LEAVES-TWO1             | 100   | 2.16E-16 |
| AT5G27720.1  | Sm-like protein LSM4 (AtLSM4)                                 | 100   | 2.16E-16 |
| AT2G46310.1* | Ethylene-responsive transcription factor CRF5                 | 42.56 | 5.69E-10 |
| AT4G31440.1  | Transcriptional regulator of RNA polII, SAGA, subunit         | 40.24 | 2.16E-16 |
| AT5G61030.1  | Glycine-rich RNA-binding protein 3, mitochondrial             | 31.24 | 1.17E-08 |
| AT3G06930.2  | Probable histone-arginine methyltransferase 1.3 (AtPRMT13)    | 19.27 | 6.48E-13 |
| AT5G10960.1  | Probable CCR4-associated factor 1 homolog 10                  | 8.57  | 2.12E-02 |
| AT1G62110.1  | Mitochondrial transcription termination factor family protein | 4.90  | 1.54E-03 |
| AT3G02550.1  | LOB (ASYMMETRIC LEAVES 2-like protein 38)                     | 4.77  | 1.01E-05 |
| AT3G15810.1  | Protein LURP-one-related 12                                   | 3.91  | 1.41E-02 |
| AT5G64420.1  | DNA polymerase V family                                       | 3.81  | 1.86E-02 |
| AT4G26000.1  | RNA-binding KH domain-containing protein PEPPER               | 3.12  | 2.46E-02 |
| AT4G10920.1  | RNA polymerase II transcriptional coactivator KELP            | 3.09  | 2.35E-02 |
| AT2G03870.2  | Sm-like protein LSM7 (AtLSM7)                                 | 2.07  | 3.78E-02 |
| AT4G40030.2  | Histone H3.3 (Histone H3.2)                                   | 48.75 | 2.16E-16 |
| AT1G10200.1  | LIM domain-containing protein WLIM1 (AtWLIM1)                 | 2.93  | 4.05E-02 |

## **20 Ribosomal proteins**

|              |                              |       |          |
|--------------|------------------------------|-------|----------|
| AT1G68590.1  | 30S ribosomal protein 3-1    | 8.01  | 7.93E-10 |
| ATCG00065.1  | 30S ribosomal protein S12    | 48.19 | 2.16E-16 |
| AT1G79850.1* | 30S ribosomal protein S17,   | 26.89 | 2.16E-16 |
| AT2G38140.1  | 30S ribosomal protein S31    | 3.42  | 5.64E-04 |
| AT3G48930.1  | 40S ribosomal protein S11-1  | 3.00  | 6.04E-06 |
| AT5G23740.1  | 40S ribosomal protein S11-3  | 1.89  | 3.95E-02 |
| AT1G07770.1  | 40S ribosomal protein S15a-1 | 1.86  | 1.73E-02 |
| AT3G53870.1  | 40S ribosomal protein S3-2   | 2.12  | 2.73E-02 |
| AT5G20290.1  | 40S ribosomal protein S8-1   | 1.80  | 4.95E-02 |
| AT5G47930.1* | 40S ribosomal protein S27-3  | 41.90 | 2.16E-16 |
| AT3G43980.1  | 40S ribosomal protein S29    | 15.51 | 3.29E-04 |
| AT4G17560.1  | 50S ribosomal protein L19-1, | 2.73  | 3.79E-02 |
| AT5G65220.1  | 50S ribosomal protein L29,   | 2.02  | 1.06E-02 |

| Accession                                                         | Protein names                                                    | Fold-change | p-value  |
|-------------------------------------------------------------------|------------------------------------------------------------------|-------------|----------|
| AT3G11250.1                                                       | 60S acidic ribosomal protein P0-3                                | 100         | 2.16E-16 |
| AT1G43170.6                                                       | 60S ribosomal protein L3-                                        | 2.06        | 4.92E-03 |
| AT4G18100.1                                                       | 60S ribosomal protein L32-1                                      | 1.79        | 4.50E-02 |
| AT1G41880.1                                                       | 60S ribosomal protein L35a-2                                     | 14.43       | 2.16E-16 |
| AT3G53740.2                                                       | 60S ribosomal protein L36-2                                      | 7.84        | 2.89E-03 |
| AT1G15250.1*                                                      | 60S ribosomal protein L37-1                                      | 9.06        | 4.07E-13 |
| AT5G02870.1                                                       | 60S ribosomal protein L4-2 (L1)                                  | 1.81        | 3.27E-02 |
| <b><u>6 Translation initiation factors</u></b>                    |                                                                  |             |          |
| AT1G66070.2                                                       | Eukaryotic translation initiation factor 3 subunit J (eIF3j)     | 11.90       | 4.14E-09 |
| AT5G35680.3                                                       | Eukaryotic translation initiation factor 4C                      | 5.23        | 5.12E-04 |
| AT4G18040.1                                                       | Eukaryotic translation initiation factor 4E-1 (mRNA cap-binding) | 25.67       | 5.01E-10 |
| AT1G76810.1                                                       | Eukaryotic translation initiation factor 5B                      | 2.11        | 1.87E-02 |
| AT1G54290.1                                                       | Protein translation factor SUI1 homolog 2                        | 29.32       | 8.11E-13 |
| AT2G39795.1                                                       | Uncharacterized protein At2g39795, mitochondrial                 | 8.76        | 2.46E-03 |
| <b><u>4 Proteinases</u></b>                                       |                                                                  |             |          |
| AT5G23210.1                                                       | Serine carboxypeptidase-like 34 (EC 3.4.16.-)                    | 7.03        | 1.01E-05 |
| AT5G62140.1                                                       | ATP-dependent Clp protease ATP-binding subunit (At5g62140)       | 3.35        | 5.10E-07 |
| AT4G30910.1                                                       | Leucine aminopeptidase 3 (Proline aminopeptidase 3)              | 2.78        | 1.10E-02 |
| AT2G44210.2                                                       | At2g44210/F4I1.2 (Carboxyl-terminal peptidase (DUF239))          | 2.69        | 4.91E-02 |
| <b><u>2 Protein inhibitors</u></b>                                |                                                                  |             |          |
| AT1G55260.1                                                       | Bifunctional inhibitor/lipid-transfer protein                    | 2.03        | 6.04E-03 |
| AT4G16500.1                                                       | Cysteine proteinase inhibitor 4 (AtCYS-4)                        | 1.99        | 1.74E-02 |
| <b><u>15 Proteins related to plant growth and development</u></b> |                                                                  |             |          |
| AT4G26410.1                                                       | RGS1-HXK1-interacting protein 1                                  | 100         | 2.16E-16 |
| AT1G67290.1                                                       | Aldehyde oxidase GLOX1 (Glyoxal oxidase 1)                       | 100         | 2.16E-16 |
| AT1G65470.1                                                       | Chromatin assembly factor 1 subunit FAS1                         | 100         | 2.16E-16 |
| AT1G10522.1                                                       | Protein PLASTID REDOX INSENSITIVE 2, chloroplastic               | 69.97       | 6.06E-14 |
| AT4G10760.1                                                       | N6-adenosine-methyltransferase MT-A70-like                       | 55.02       | 2.16E-16 |
| AT1G75750.1                                                       | Gibberellin-regulated protein 1 (GAST1 protein homolog 1)        | 50.74       | 2.16E-16 |
| AT3G10405.1                                                       | At3g10405 (Vacuolar acid trehalase)                              | 27.02       | 9.52E-13 |
| AT1G43620.1                                                       | Sterol 3-beta-glucosyltransferase UGT80B1                        | 28.349      | 2.21E-08 |
| AT3G11450.1                                                       | DnaJ and Myb-like DNA-binding domain-containing protein          | 26.56       | 4.19E-05 |
| AT2G46720.1                                                       | 3-ketoacyl-CoA synthase 13 (KCS-13)                              | 7.315       | 4.51E-06 |
| AT1G71720.1                                                       | Protein PIGMENT DEFECTIVE 338                                    | 6.64        | 5.90E-06 |
| AT3G02480.1                                                       | Late embryogenesis abundant protein (LEA)                        | 5.98        | 4.67E-14 |
| AT5G48840.1                                                       | Pantoate--beta-alanine ligase (Pantoate-activating enzyme)       | 3.35        | 3.26E-02 |
| AT3G17520.1*                                                      | Late embryogenesis abundant protein (LEA) family protein         | 2.07        | 3.04E-03 |
| AT1G32415.1                                                       | Pentatricopeptide repeat-containing protein At1g32415            | 2.17        | 1.96E-02 |
| <b><u>127 Other proteins</u></b>                                  |                                                                  |             |          |
| AT2G04845.1                                                       | Acyl-CoA N-acyltransferases (NAT) superfamily protein            | 100         | 2.16E-16 |

| Accession    | Protein names                                                   | Fold-change | p-value  |
|--------------|-----------------------------------------------------------------|-------------|----------|
| AT1G15410.1  | Aspartate-glutamate racemase family (F9L1.36 protein)           | 100         | 2.16E-16 |
| AT1G14380.3  | At1g14380 (IQ-domain 28)                                        | 100         | 2.16E-16 |
| AT1G16960.1  | F6I1.3 protein (Ubiquitin domain-containing protein)            | 100         | 2.16E-16 |
| AT1G18660.4  | At1g18660 (Expressed protein)                                   | 100         | 2.16E-16 |
| AT1G22520.2  | At1g22520 (MICOS complex subunit Mic10-like protein             | 100         | 2.16E-16 |
| AT1G36320.1  | At1g36320/F7F23_4                                               | 100         | 2.16E-16 |
| AT5G22340.2  | At5g22340 (NF-kappa-B inhibitor-like protein)                   | 100         | 2.16E-16 |
| AT5G45040.1  | Cytochrome c6, chloroplastic (Cytochrome c-552) (Atc6)          | 100         | 2.16E-16 |
| AT1G16410.1  | Dihomomethionine N-hydroxylase (Cytochrome P450 79F1)           | 100         | 2.16E-16 |
| AT2G21440.1  | Expressed protein (RNA-binding (RRM/RBD/RNP motifs)             | 100         | 2.16E-16 |
| AT1G31150.1  | F28K20.8 protein (K-box region protein (DUF1985))               | 100         | 2.16E-16 |
| AT2G26160.1  | F-box protein At2g26160                                         | 100         | 2.16E-16 |
| AT2G26030.1  | F-box/FBD/LRR-repeat protein At2g26030                          | 100         | 2.16E-16 |
| AT2G37050.3  | Leucine-rich repeat protein kinase family protein               | 100         | 2.16E-16 |
| AT4G26965.1  | NADH dehydrogenase 1 alpha subcomplex subunit 12                | 100         | 2.16E-16 |
| AT5G64080.1  | Non-specific lipid transfer protein GPI-anchored 31 (AtLTPG-31) | 100         | 2.16E-16 |
| AT3G04760.1  | Pentatricopeptide repeat-containing protein                     | 100         | 2.16E-16 |
| AT4G19830.1  | Peptidyl-prolyl cis-trans isomerase FKBP17-1                    | 100         | 2.16E-16 |
| AT3G50520.1  | Phosphoglycerate mutase-like protein 4                          | 100         | 2.16E-16 |
| AT2G43235.1  | Phosphoribosylformylglycinamide synthase                        | 100         | 2.16E-16 |
| AT4G22150.1  | Plant UBX domain-containing protein 3 (PUX3)                    | 100         | 2.16E-16 |
| AT5G36950.1  | Protease Do-like 10, mitochondrial                              | 100         | 2.16E-16 |
| AT5G50000.1  | Protein kinase (Protein kinase superfamily protein)             | 100         | 2.16E-16 |
| AT4G24680.1  | Protein MODIFIER OF SNC1 1 (MODIFIER OF snc1, 1)                | 100         | 2.16E-16 |
| AT3G62240.1  | RING-type E3 ubiquitin transferase                              | 100         | 2.16E-16 |
| AT2G07599.2  | Uncharacterized protein                                         | 100         | 2.16E-16 |
| AT1G19520.1  | Pentatricopeptide repeat-containing protein At1g19525           | 79.66       | 2.16E-16 |
| AT5G59470.1  | Mannose-P-dolichol utilization defect 1 protein homolog 1       | 70.35       | 2.16E-16 |
| AT1G66820.1  | Glycine-rich protein                                            | 66.84       | 2.16E-16 |
| AT1G70430.1  | Protein kinase superfamily protein                              | 57.87       | 2.16E-16 |
| AT5G24165.1  | Uncharacterized protein At5g24165                               | 46.96       | 2.16E-16 |
| AT2G45930.1  | Expressed protein                                               | 40.52       | 2.16E-16 |
| AT3G61960.1  | Serine/threonine-protein kinase ATG1a (AtAPG1a)                 | 38.92       | 4.92E-08 |
| AT1G22840.1  | Cytochrome c-1 (Cytochrome c At1g22840)                         | 38.35       | 3.57E-10 |
| AT4G26720.1  | Serine/threonine-protein phosphatase PP-X isozyme 1             | 38.19       | 2.14E-10 |
| AT1G51650.1  | ATP synthase subunit epsilon, (ATPase subunit epsilon)          | 37.94       | 2.96E-10 |
| AT3G62810.1* | At3g62810 (Complex 1 family protein / LVR family protein)       | 37.75       | 1.67E-09 |
| AT4G13180.1  | AT4g13180/F17N18_70 (NAD(P)-binding Rossmann-fold               | 37.32       | 2.16E-16 |
| AT3G28460.1  | Methyltransferase                                               | 37.24       | 1.12E-09 |
| AT1G04190.1* | Tetratricopeptide repeat (TPR)-like superfamily protein         | 32.91       | 1.41E-14 |
| AT4G28660.2  | Photosystem II reaction center PSB28 protein                    | 30.42       | 6.89E-10 |
| AT1G59760.1  | DExH-box ATP-dependent RNA helicase DExH9                       | 29.27       | 2.16E-16 |
| AT5G04850.2  | Vacuolar protein sorting-associated protein 60.2                | 29.19       | 4.55E-08 |
| AT5G52100.1  | Dihydrodipicolinate reductase-like protein CRR1                 | 25.63       | 1.47E-13 |
| AT4G08960.1  | Serine/threonine-protein phosphatase 2A activator               | 24.94       | 1.62E-07 |

| Accession    | Protein names                                                   | Fold-change | p-value  |
|--------------|-----------------------------------------------------------------|-------------|----------|
| AT1G76955.1  | At1g76955 (Expressed protein)                                   | 23.59       | 4.10E-05 |
| AT1G20816.1  | Outer envelope pore protein 21A,                                | 20.83       | 1.89E-06 |
| AT5G16010.1  | 3-oxo-5- $\alpha$ -steroid 4-dehydrogenase family protein       | 20.18       | 2.16E-16 |
| AT3G59810.1  | Sm-like protein LSM6A (AtLSM6A)                                 | 20.06       | 2.16E-16 |
| AT3G05520.2  | F-actin-capping protein subunit alpha (CapZ alpha)              | 19.84       | 1.40E-04 |
| AT5G62980.1  | Dihydroneopterin aldolase 2 (DHNA2)                             | 18.96       | 1.82E-06 |
| AT4G08160.1  | Glycosyl hydrolase family 10 protein                            | 17.27       | 1.62E-10 |
| AT4G32920.1  | Glycine-rich protein                                            | 15.03       | 2.22E-04 |
| AT3G59890.1  | 4-hydroxy-tetrahydrodipicolinate reductase 2                    | 14.97       | 8.08E-05 |
| AT1G73400.1  | Pentatricopeptide repeat-containing protein At1g73400,          | 14.55       | 5.42E-11 |
| AT1G74390.1  | Protein NEN3                                                    | 14.4        | 1.79E-10 |
| AT2G23670.1  | At2g23670/F26B6.32 (Homolog of Synechocystis YCF37)             | 13.95       | 2.16E-16 |
| AT4G37270.1  | Probable cadmium/zinc-transporting ATPase HMA1,                 | 13.76       | 5.99E-05 |
| AT4G17030.1  | Expansin-like B1 (At-EXPR1) (Ath-ExpBeta-3.1)                   | 13.24       | 2.95E-03 |
| AT2G14750.1  | Adenylyl-sulfate kinase 1, (APS kinase 1)                       | 12.27       | 9.90E-10 |
| AT2G22795.1  | Uncharacterized protein                                         | 12.23       | 4.77E-04 |
| AT2G20690.1  | At2g20690/F5H14.34 (Lumazine-binding family protein)            | 11.39       | 4.74E-15 |
| AT1G03650.1  | Acyl-CoA N-acyltransferases (NAT) superfamily protein           | 10.91       | 2.30E-08 |
| AT3G48140.1* | AT3G48140 protein (HVB12D homologue)                            | 10.69       | 3.71E-04 |
| AT4G29090.1  | Putative reverse transcriptase/RNA-dependent DNA polymerase     | 10.53       | 2.00E-07 |
| AT2G44620.1  | Acyl carrier protein 1                                          | 10.14       | 6.60E-04 |
| AT3G48560.1* | Protein CHLORSULFURON RESISTANT 1                               | 10.13       | 2.14E-13 |
| AT1G01600.1  | Cytochrome P450 86A4                                            | 10.05       | 1.10E-04 |
| AT2G46170.1* | Reticulon-like protein B5 (AtRTNLB5)                            | 9.74        | 2.06E-08 |
| AT1G05270.1  | At1g05270 (TraB family protein)                                 | 9.63        | 3.04E-04 |
| AT1G60000.1  | AT1G60000 protein (Nucleic acid-binding protein, putative)      | 9.53        | 1.43E-07 |
| AT3G52920.2  | RAB6-interacting golgin                                         | 8.78        | 3.95E-07 |
| AT2G35120.1  | Glycine cleavage system H protein 2, mitochondrial              | 8.26        | 5.00E-07 |
| AT2G23910.1  | At2g23910 (NAD(P)-binding Rossmann-fold proteins                | 8.24        | 1.64E-03 |
| AT1G16560.2  | Post-GPI attachment to proteins factor 3                        | 7.88        | 1.29E-02 |
| AT1G14300.2  | Protein HGH1 homolog                                            | 7.66        | 3.49E-02 |
| AT3G19000.1  | 2-oxoglutarate (2OG) and Fe(II)-dependent oxygenase protein     | 7.13        | 5.48E-06 |
| AT2G47640.1  | Small nuclear ribonucleoprotein Sm D2 (Sm-D2)                   | 6.94        | 1.25E-07 |
| AT2G21860.1  | At2g21860/F7D8.18 (Violaxanthin de-epoxidase-like protein)      | 6.66        | 4.77E-03 |
| AT3G51520.1* | Diacylglycerol O-acyltransferase 2 (AtDGAT2)                    | 6.59        | 5.66E-03 |
| AT1G03100.1  | Pentatricopeptide repeat-containing protein At1g03100           | 6.27        | 2.16E-16 |
| AT3G07090.1  | PPPDE putative thiol peptidase family protein (T1B9.26 protein) | 6.09        | 2.16E-04 |
| AT5G06180.1  | AT5G06180 protein (Fission ELM1-like protein (DUF1022)          | 5.8         | 3.73E-02 |
| AT3G23760.1  | Transferring glycosyl group transferase                         | 5.68        | 3.12E-05 |
| AT2G40480.1  | WEB family protein At2g40480                                    | 5.63        | 1.13E-04 |
| AT5G47030.1* | ATP synthase subunit delta', (F-ATPase delta' subunit)          | 5.4         | 3.91E-05 |
| AT1G04280.1  | Calmodulin calcium-dependent NAD kinase                         | 5.17        | 3.47E-02 |
| AT1G35420.2  | Alpha/beta-Hydrolases superfamily protein                       | 5.12        | 1.52E-05 |
| AT4G33625.1  | At4g33625 (Vacuole protein)                                     | 5.08        | 5.13E-06 |
| AT2G18040.1  | Peptidyl-prolyl cis-trans isomerase Pin1 (PPIase Pin1)          | 5.01        | 9.87E-07 |

| Accession    | Protein names                                                    | Fold-change | p-value  |
|--------------|------------------------------------------------------------------|-------------|----------|
| AT2G28630.1  | 3-ketoacyl-CoA synthase 12 (KCS-12)                              | 5           | 8.52E-03 |
| AT5G52800.3  | DNA primase                                                      | 4.96        | 3.08E-12 |
| AT1G36280.1  | Adenylosuccinate lyase (ASL) (Adenylosuccinase)                  | 4.86        | 5.04E-04 |
| AT2G43810.1  | Sm-like protein LSM36B (AtLSM6B)                                 | 4.66        | 2.55E-03 |
| AT2G20560.1  | At2g20560/T13C7.15 (DNAJ heat shock family protein)              | 4.21        | 7.69E-03 |
| AT5G48375.1  | Putative myrosinase 3 (EC 3.2.1.147) (Beta-glucosidase 39)       | 4.09        | 1.02E-02 |
| AT1G50520.1  | Cytochrome P450, family 705, subfamily A, polypeptide 27         | 4.08        | 8.14E-03 |
| AT3G16390.1  | Nitrile-specifier protein 3 (AtNSP3) (Jacalin-related lectin 27) | 4.03        | 2.17E-03 |
| AT3G18940.1  | Proteasome assembly chaperone 2                                  | 3.69        | 1.20E-08 |
| AT3G17930.1  | AT3g17930/MEB5_15 (Transmembrane protein)                        | 3.64        | 2.99E-03 |
| AT1G60550.1  | 1,4-dihydroxy-2-naphthoyl-CoA synthase, peroxisomal (DHNS)       | 3.5         | 2.60E-02 |
| AT2G17972.1  | Expressed protein (Transmembrane protein)                        | 3.47        | 1.58E-02 |
| AT4G21090.1  | Adrenodoxin-like protein 2 (AtMFDX2)                             | 3.47        | 4.00E-03 |
| AT3G49430.1  | Serine/arginine-rich splicing factor SR34A (At-SR34A)            | 3.13        | 4.83E-02 |
| AT5G56090.1  | Cytochrome c oxidase assembly protein COX15                      | 3.04        | 2.37E-03 |
| AT4G27585.1  | SPFH/Band 7/PHB domain-containing membrane-associated            | 2.94        | 2.29E-03 |
| ATCG00710.1  | Photosystem II reaction center protein H (PSII-H)                | 2.68        | 2.93E-05 |
| AT3G22480.2  | Probable prefoldin subunit 2                                     | 2.63        | 1.89E-02 |
| AT3G52340.2  | Probable sucrose-phosphatase 3b (AtSPP3b)                        | 2.62        | 2.15E-02 |
| ATCG00730.1  | Cytochrome b6-f complex subunit 4 (17 kDa polypeptide)           | 2.48        | 2.39E-04 |
| AT5G28750.1  | Sec-independent protein translocase protein TATA                 | 2.47        | 3.54E-02 |
| AT4G28025.1  | Uncharacterized protein At4g28025                                | 2.43        | 2.64E-02 |
| AT4G01150.1  | Protein CURVATURE THYLAKOID 1A, chloroplastic                    | 2.23        | 1.35E-03 |
| AT1G14980.1  | 10 kDa chaperonin, mitochondrial (Chaperonin 10) (CPN10)         | 2.22        | 2.68E-03 |
| AT3G21055.1  | Photosystem II 5 kDa protein, chloroplastic (PSII-T)             | 2.12        | 6.99E-03 |
| AT1G73110.1  | At1g73110/F3N23_39                                               | 2.1         | 2.77E-02 |
| AT5G65780.1  | Branched-chain-amino-acid aminotransferase 5, (Atbcat-5)         | 2.05        | 4.38E-02 |
| AT5G39570.1* | Uncharacterized protein At5g39570                                | 1.97        | 1.43E-02 |
| AT3G63160.1  | AT3g63160/F16M2_10 (At3g63160) (Outer envelope membrane)         | 1.93        | 1.86E-02 |
| AT1G33811.1  | GDSL esterase/lipase At1g33811                                   | 1.88        | 4.76E-02 |
| AT1G10590.3  | Nucleic acid-binding, OB-fold-like protein (T10O24.24)           | 1.88        | 4.69E-02 |
| AT1G15270.1  | F9L1.21 protein (Translation machinery associated TMA7)          | 1.85        | 4.87E-02 |
| AT1G76100.1  | Plastocyanin minor isoform, chloroplastic                        | 1.82        | 2.92E-02 |
| AT2G24420.2  | AT2G24420 protein (At2g24420/T28I24.15)                          | 1.82        | 4.03E-02 |
| AT1G65020.1  | At1g65020 (Plasma protein)                                       | 1.77        | 4.47E-02 |
| AT3G26740.1  | Light-regulated protein 1 (Protein CCR-LIKE, chloroplastic)      | 1.76        | 3.50E-02 |

**Supplementary Table S3.** List of fungal proteins expressed on the leaf surface. BP: biological process; MF: molecular function

| Uniprot ID                                               | Protein name                             | SignalP   | EffectorP    | Ontology                                                                                                                                                                      |
|----------------------------------------------------------|------------------------------------------|-----------|--------------|-------------------------------------------------------------------------------------------------------------------------------------------------------------------------------|
| Specifically identified proteins at 24 hpi samples       |                                          |           |              |                                                                                                                                                                               |
| I1REV2                                                   | Uncharacterized protein                  | Secretory | Non-effector | Hydrolase activity, acting on carbon-nitrogen (but not peptide) bonds, in linear amidines (MF); metal ion binding (MF)                                                        |
| I1RPJ8                                                   | Uncharacterized protein                  | Secretory | Non-effector | Uncharacterized protein                                                                                                                                                       |
| I1RWF4                                                   | Cytochrome b5 heme-binding proteins      | Others    | Non-effector | Heme binding (MF); metal ion binding (MF)                                                                                                                                     |
| I1RC74                                                   | Uncharacterized protein                  | Others    | Non-effector | Catalytic activity (MF); pyridoxal phosphate binding (MF)                                                                                                                     |
| I1RDG5                                                   | TauD domain-containing protein           | Others    | Non-effector | TauD domain refers to a protein domain that in many enteric bacteria is used to break down taurine (2-aminoethanesulfonic acid) as a source of sulfur under stress conditions |
| I1S138                                                   | NmrA domain-containing protein           | Others    | Non-effector | A new protein carrying an NmrA-like domain is required for cell differentiation and development in <i>Dictyostelium discoideum</i>                                            |
| Commonly identified proteins at 4 hpi and 24 hpi samples |                                          |           |              |                                                                                                                                                                               |
| A0A0E0S530                                               | Uncharacterized protein                  | Others    | Effector     | Catalytic activity (MF)                                                                                                                                                       |
| I1RDZ6                                                   | Nitroreductase domain-containing protein | Others    | Effector     | Cellular response to oxidative stress (BP)                                                                                                                                    |
| I1RMF2                                                   | Ypt/Rab-type GTPase Rab7                 | Others    | Effector     | Regulates the FgAtg9 for autophagy-dependent development and pathogenicity of <i>F. graminearum</i>                                                                           |
| I1S287                                                   | Uncharacterized protein                  | Others    | Effector     | GTPase activity (MF); GTP binding (MF)                                                                                                                                        |
| I1S361                                                   | SGNH_hydro domain-containing protein     | Secretory | Effector     | SGNH_Hydro domain found in fungal Rhamnogalacturonan acetyltransferase which is important for <i>F. graminearum</i> growth on plant cell wall                                 |
| A0A098D0Q4                                               | TauD domain-containing protein           | Others    | Non-effector | Oxidoreductase activity (MF)                                                                                                                                                  |
| A0A098DA88                                               | Fork-head domain-containing protein      | Others    | Non-effector | Two other Fork-head transcription factors role the fungal growth and pathogenicity                                                                                            |
| A0A098DJX8                                               | BTB domain-containing protein            | Others    | Non-effector | Many BTB proteins are transcriptional regulators that are thought to act through the control of chromatin structure.                                                          |

| Uniprot ID | Protein name                                | SignalP | EffectorP    | Ontology                                                                                                                                                                                                          |
|------------|---------------------------------------------|---------|--------------|-------------------------------------------------------------------------------------------------------------------------------------------------------------------------------------------------------------------|
| A0A098DP80 | Bac_luciferase domain-containing protein    | Others  | Non-effector | monooxygenase activity (MF); Oxidoreductase activity, acting on paired donors, with incorporation or reduction of molecular oxygen (MF)                                                                           |
| A0A098DTE3 | GST C-terminal domain-containing protein    | Others  | Non-effector | Glutathione metabolic process (BP)                                                                                                                                                                                |
| A0A098DVM4 | Uncharacterized protein                     | Others  | Non-effector | GTPase activity (MF); GTP binding (MF)                                                                                                                                                                            |
| A0A0E0RSG8 | Aspartate--tRNA ligase                      | Others  | Non-effector | Aspartyl-tRNA aminoacylation (BP); aspartate-tRNA ligase activity (BP); ATP binding (BP)                                                                                                                          |
| A0A0E0S8X8 | Oxidored_FMN domain-containing protein      | Others  | Non-effector | FMN binding (MF); oxidoreductase activity (MF)                                                                                                                                                                    |
| A0A1C3YJJ0 | cobW domain-containing protein              | Others  | Non-effector | CobW proteins are generally found proximal to the trimeric cobaltochelate subunit CobN, which is essential for vitamin B12 (cobalamin) biosynthesis                                                               |
| A0A1C3YLC3 | Uncharacterized protein                     | Others  | Non-effector | Uncharacterized protein                                                                                                                                                                                           |
| A0A1C3YM05 | Uncharacterized protein                     | Others  | Non-effector | ATPase activity (MF); ATP binding (MF)                                                                                                                                                                            |
| I1R9Y9     | PCI domain-containing protein               | Others  | Non-effector | The PCI domain mediates and stabilizes protein-protein interactions within the complexes. The role of the PCI domains is most likely that of a scaffold for the other complex subunits and other binding partners |
| I1RA13     | Acetyl-coenzyme synthetase A                | Others  | Non-effector | Acetyl-CoA biosynthetic process from acetate (BP)                                                                                                                                                                 |
| I1RA52     | Complex1_49kDa domain-containing protein    | Others  | Non-effector | NAD binding (MF); oxidoreductase activity, acting on NAD(P)H (MF); quinone binding (MF)                                                                                                                           |
| I1RC52     | Uncharacterized protein                     | Others  | Non-effector | Intracellular protein transport (BP)                                                                                                                                                                              |
| I1RCZ9     | Phospho-2-dehydro-3-deoxyheptonate aldolase | Others  | Non-effector | aromatic amino acid family biosynthetic process (BP); chorismate biosynthetic process (BP)                                                                                                                        |
| I1RDB1     | AAA domain-containing protein               | Others  | Non-effector | Protein catabolic process (BP)                                                                                                                                                                                    |
| I1RDN3     | Acetyl-coenzyme synthetase A                | Others  | Non-effector | Acetyl-CoA biosynthetic process from acetate (BP)                                                                                                                                                                 |
| I1REA2     | CCHC-type domain-containing protein         | Others  | Non-effector | Zinc finger, nucleic acid binding (MF); zinc ion binding (MF)                                                                                                                                                     |
| I1RJB7     | Uncharacterized protein                     | Others  | Non-effector | Isomerase activity (MF)                                                                                                                                                                                           |

| Uniprot ID | Protein name                              | SignalP | EffectorP    | Ontology                                                                                                                                |
|------------|-------------------------------------------|---------|--------------|-----------------------------------------------------------------------------------------------------------------------------------------|
| I1RL01     | Uncharacterized protein                   | Others  | Non-effector | Uncharacterized protein                                                                                                                 |
| I1RMK0     | Uncharacterized protein                   | Others  | Non-effector | Uncharacterized protein                                                                                                                 |
| I1RN31     | Protein kinase domain-containing protein  | Others  | Non-effector | ATP binding (MF); protein serine/threonine kinase activity (MF)                                                                         |
| I1RN43     | Protein kinase domain-containing protein  | Others  | Non-effector | ATP binding (MF); protein kinase activity (MF)                                                                                          |
| I1RQN9     | Mitogen-activated protein kinase          | Others  | Non-effector | ATP binding (MF); MAP kinase activity (MF)                                                                                              |
| I1RR84     | PKS_ER domain-containing protein          | Others  | Non-effector | Oxidoreductase activity (MF)                                                                                                            |
| I1RS20     | eRF1_1 domain-containing protein          | Others  | Non-effector | Translation release factor activity (MF)                                                                                                |
| I1RSU7     | Uncharacterized protein                   | Others  | Non-effector | Metal ion binding (MF)                                                                                                                  |
| I1RSY9     | Aldo_ket_red domain-containing protein    | Others  | Non-effector | Oxidoreductase activity (MF)                                                                                                            |
| I1RTS4     | TauD domain-containing protein            | Others  | Non-effector | Oxidoreductase activity (MF)                                                                                                            |
| I1RW16     | Protein kinase domain-containing protein  | Others  | Non-effector | ATP binding (MF); protein serine/threonine kinase activity (MF)                                                                         |
| I1RW55     | Uncharacterized protein                   | Others  | Non-effector | acyl-CoA dehydrogenase activity (MF); flavin adenine dinucleotide binding (MF)                                                          |
| I1RWE8     | Methionyl-tRNA synthetase                 | Others  | Non-effector | Methionyl-tRNA aminoacylation (BP)                                                                                                      |
| I1RX54     | PH domain-containing protein              | Others  | Non-effector | Maintenance of protein location in cell cortex (BP)                                                                                     |
| I1RXF0     | Plug_translocon domain-containing protein | Others  | Non-effector | Protein transport (BP)                                                                                                                  |
| I1RYM9     | Drf_GBD domain-containing protein         | Others  | Non-effector | Actin cytoskeleton organization (BP)                                                                                                    |
| I1RZK4     | AAA domain-containing protein             | Others  | Non-effector | ATPase activity (MF); ATP binding (MF)                                                                                                  |
| I1S0H5     | Uncharacterized protein                   | Others  | Non-effector | Hydrolase activity (MF)                                                                                                                 |
| I1S1H0     | Uncharacterized protein                   | Others  | Non-effector | Monooxygenase activity (MF); oxidoreductase activity, acting on paired donors, with incorporation or reduction of molecular oxygen (MF) |
| I1S203     | NACHT domain-containing protein           | Others  | Non-effector | The NACHT domain is found in association with other domains, such as the WD repeat, the leucine-rich repeat (LRR) or the BIR repeat     |



| Uniprot ID | Protein name                           | SignalP | EffectorP    | Ontology                                                                                                                                                       |
|------------|----------------------------------------|---------|--------------|----------------------------------------------------------------------------------------------------------------------------------------------------------------|
| Q4IR18     | Polynucleotide 5'-hydroxyl-kinase GRC3 | Others  | Non-effector | Polynucleotide 5'-kinase involved in rRNA processing                                                                                                           |
| V6R5D2     | Aldedh domain-containing protein       | Others  | Non-effector | Oxidoreductase activity, acting on the aldehyde or oxo group of donors, NAD or NADP as acceptor (MF)                                                           |
| V6R7G9     | Oxidored_FMN domain-containing protein | Others  | Non-effector | FMN binding (MF); oxidoreductase activity (MF)                                                                                                                 |
| V6RQ48     | AP complex subunit beta                | Others  | Non-effector | Adaptins are components of the adaptor complexes which link clathrin to receptors in coated vesicles.                                                          |
| I1RFQ1     | JAB_MPN domain-containing protein      | Others  | Non-effector | mRNA splicing, via spliceosome (BP)                                                                                                                            |
| I1RZM4     | Serine hydroxymethyltransferase        | Others  | Non-effector | Interconversion of serine and glycine.                                                                                                                         |
| A0A0E0SJS1 | Uncharacterized protein                | Others  | Non-effector | GTP binding (MF)                                                                                                                                               |
| A0A098DJ03 | Thioredoxin domain-containing protein  | Others  | Non-effector | Thiol-specific peroxidase that catalyzes the reduction of hydrogen peroxide and organic hydroperoxides to water and alcohols, respectively.                    |
| A0A1C3YHY6 | Uncharacterized protein                | Others  | Non-effector | Uncharacterized protein                                                                                                                                        |
| I1RFJ1     | Thiamine thiazole synthase             | Others  | Non-effector | Involved in biosynthesis of the thiamine precursor thiazole. May have additional roles in adaptation to various stress conditions and in DNA damage tolerance. |
